# Supplementary material
Source: PubMed Central journal article supplement (PMC10802116)
Supplement: NIHMS1957679-supplement-Supplemental_Digital_Content_1.pdf [file NIHMS1957679-supplement-Supplemental_Digital_Content_1.pdf]

## Supplemental Methods

This systematic review, prepared according to the Preferred Reporting Items for Systematic Reviews and Meta-Analyses (PRISMA) statement checklist (1), was registered in the PROSPERO database (2017:CRD42017080258) on 12/18/2017.

### *Data sources and searches*

We searched PubMed, EMBASE, Scopus, Web of Science, and Clinicaltrials.gov (see Appendix-1 for search strategies). The electronic searches were conducted without language restrictions from each database's inception to 03/15/2018 and used the same search terms as those employed previously to examine the evidence for CMS's SEP-1 bundle and its components (2). We also examined all supplementary data from studies including that which was available electronically and when applicable that data was included in our analysis. Finally, we scanned the references of relevant studies from the searches.

### *Study selection*

We included randomized and observational studies of adult patients ( $\geq 16$  years old) with sepsis, severe sepsis, or septic shock that compared mortality rates between patients receiving *versus* not receiving a focused sepsis bundle that included: antibiotic administration and/or fluid infusion, with or without vasopressors if needed. We excluded studies with bundles that used components of the volume status and tissue perfusion assessment no longer required with SEP-1 in 2018 (i.e., a clinician's focused exam with vital signs, cardiopulmonary, capillary refill, peripheral pulse and skin examination, CVP measurements, ScvO<sub>2</sub> measurements, bedside cardiovascular ultrasound, passive leg raises or fluid challenges) (2). Two authors (DJP, PQE)

reviewed searches, first screening titles and abstracts followed by a full-text review of selected articles. Author consensus resolved uncertainty regarding study inclusion.

### *Endpoints*

For included studies we first examined the overall effect of bundles on survival. We then examined in these studies whether the effect on survival of bundles stipulating a 30mL/kg fluid volume differed from the effects of bundles either stipulating a volume other than 30mL/kg fluid or that did not stipulate a volume (termed individualized volumes). The same analysis was done comparing the survival effects of bundles requiring serial lactate measurements versus bundles that did not. In studies reporting data, the effects of bundles on the proportion of patients receiving antibiotics or fluids within the stipulated time (termed timely administration), the time to the administration of these components, and/or the volume of administered fluid were also assessed.

### *Data extraction and quality assessment*

Two authors (DJP and PQE) extracted data from studies using a standardized tool (Appendix-2) and three authors (DJP, JS, and PQE) checked data accuracy. Extracted data included the study location, type of sepsis investigated (sepsis, severe sepsis or septic shock), baseline patient characteristics (age, sex, comorbidities, illness severity, and site of infection), the outcomes examined, bundle composition and data about bundle administration including the interval from time-zero to intervention administration; the proportion of patients receiving the intervention within the stipulated time goals; the amount of the intervention administered if it was a treatment; overall bundle administration; and adverse effects potentially related to bundle

use. Fluid infusion requirements in bundles were defined as either stipulating 30mL/kg, stipulating a specific volume other than 30mL/kg, or not stipulating any specific volume (i.e. individualized volumes). Baseline characteristics in a study were considered to favor the bundle group if bundle patients were younger, had fewer comorbidities or decreased illness severity, or had a lower proportion of pulmonary or abdominal infections ( $p < 0.05$  considered statistically significant).

We recorded adjunctive aids in studies that may have confounded survival results including i) educational aids to improve provider recognition and care of septic patients (e.g., conferences or lectures) or ii) prioritized care aids which directly affected the management of septic patients (e.g., priority bed allocation or sepsis alert systems). Risk of bias was to be assessed for randomized trials with the Cochrane Collaboration's risk of bias assessment tool, and for observational studies with the Newcastle-Ottawa Scale (3,4). Two investigators (DJP and PQE) assessed this risk independently and settled disagreements by consensus. All components of either tool had to be graded as low risk to conclude that a study had a low risk of bias overall. For observational studies, comparability bias was based on whether the severity of illness and the presence of comorbidities were recorded and similar at baseline.

The primary outcome examined was survival assessed as the odds ratio of survival and considered in the following hierarchy: 90-day, 60-day, 30-day, 28-day, hospital, or intensive care unit. We assessed outcome bias based on whether survival was determined blindly and/or from record linkage or not, and whether  $\geq 28$ -d survival and follow-up adequacy were reported.

### *Data synthesis and analysis*

We determined effect estimates for each intervention. For binary outcomes including survival or the proportion of patients receiving an intervention, odds ratios (OR) and their 95% confidence intervals (95%CI) were calculated. For time to a test or treatment or the amount of treatment, reported median and interquartile range values were converted to mean difference and standard error (SE) values using the method of Wan *et al.* (5) We provided outcome summary estimates for the included studies using random-effects model adjusting for < 20 studies with the Hartung-Knapp method (6). Heterogeneity among studies was assessed using the Q statistic and  $I^2$  value (7). Two-sided p-values <0.05 were considered significant. Publication bias was assessed using funnel plots and Egger's regression (p-value <0.10 considered significant) (8). All analyses were performed using R (version 3.4.4) with packages meta (version 4.9-1) and metafor (version 2.0-0) (9-11).

### *Role of funding source*

Intra-mural funding from the National Institutes of Health (NIH) supported this work. The NIH had no role in the design of the study or the collection, analysis, and interpretation of the data.

## References

1. Quality Reporting Center. SEP-1 Early Management Bundle, Severe Sepsis/Septic Shock: v5.4 Measure Updates Accessed <https://www.qualityreportingcenter.com/event/sep-1-early-management-bundle-severe-sepsis-septic-shock-v5-4-measure-updates/>
2. Pepper DJ, Jaswal D, Sun J, Welsh J, Natanson C, Eichacker PQ. Evidence Underpinning the Centers for Medicare & Medicaid Services' Severe Sepsis and Septic Shock Management Bundle (SEP-1): A Systematic Review. *Ann Intern Med.* 2018 Apr 17;168(8):558-568.
3. Higgins JP, Altman DG, Gøtzsche PC, Jüni P, Moher D, Oxman AD, et al; Cochrane Bias Methods Group. The Cochrane Collaboration's tool for assessing risk of bias in randomised trials. *BMJ.* 2011;343:d5928. [PMID: 22008217] doi:10.1136/bmj.d5928
4. Stang A. Critical evaluation of the Newcastle-Ottawa scale for the assessment of the quality of nonrandomized studies in meta-analyses. *Eur J Epidemiol.* 2010;25:603-5. [PMID: 20652370] doi:10.1007/s10654-010-9491-z
5. Wan X, Wang W, Liu J, Tong T. Estimating the sample mean and standard deviation from the sample size, median, range and/or interquartile range. *BMC Med Res Methodol.* 2014;14:135. [PMID: 25524443] doi:10.1186/1471-2288-14-135
6. Knapp G, Hartung J. Improved Tests for a Random Effects Meta-regression with a Single Covariate. *Stat Med.* 2003 Sep 15;22(17):2693-710
7. Higgins JP, Thompson SG. Quantifying heterogeneity in a meta-analysis. *Stat Med.* Jun 15 2002;21(11):1539-1558.
8. Egger M, Davey Smith G, Schneider M, Minder C. Bias in meta-analysis detected by a simple, graphical test. *BMJ.* 1997;315(7109):629-634.

9. R Core Team (2016). R: A language and environment for statistical computing. R Foundation for Statistical Computing, Vienna, Austria. URL <http://www.R-project.org/>.
10. Schwarzer G. (2007) meta: An R package for meta-analysis, R News, 7(3), 40-45.
11. Viechtbauer, W. (2010). Conducting meta-analyses in R with the metafor package. Journal of Statistical Software, 36(3), 1-48.

Appendix Figure 1

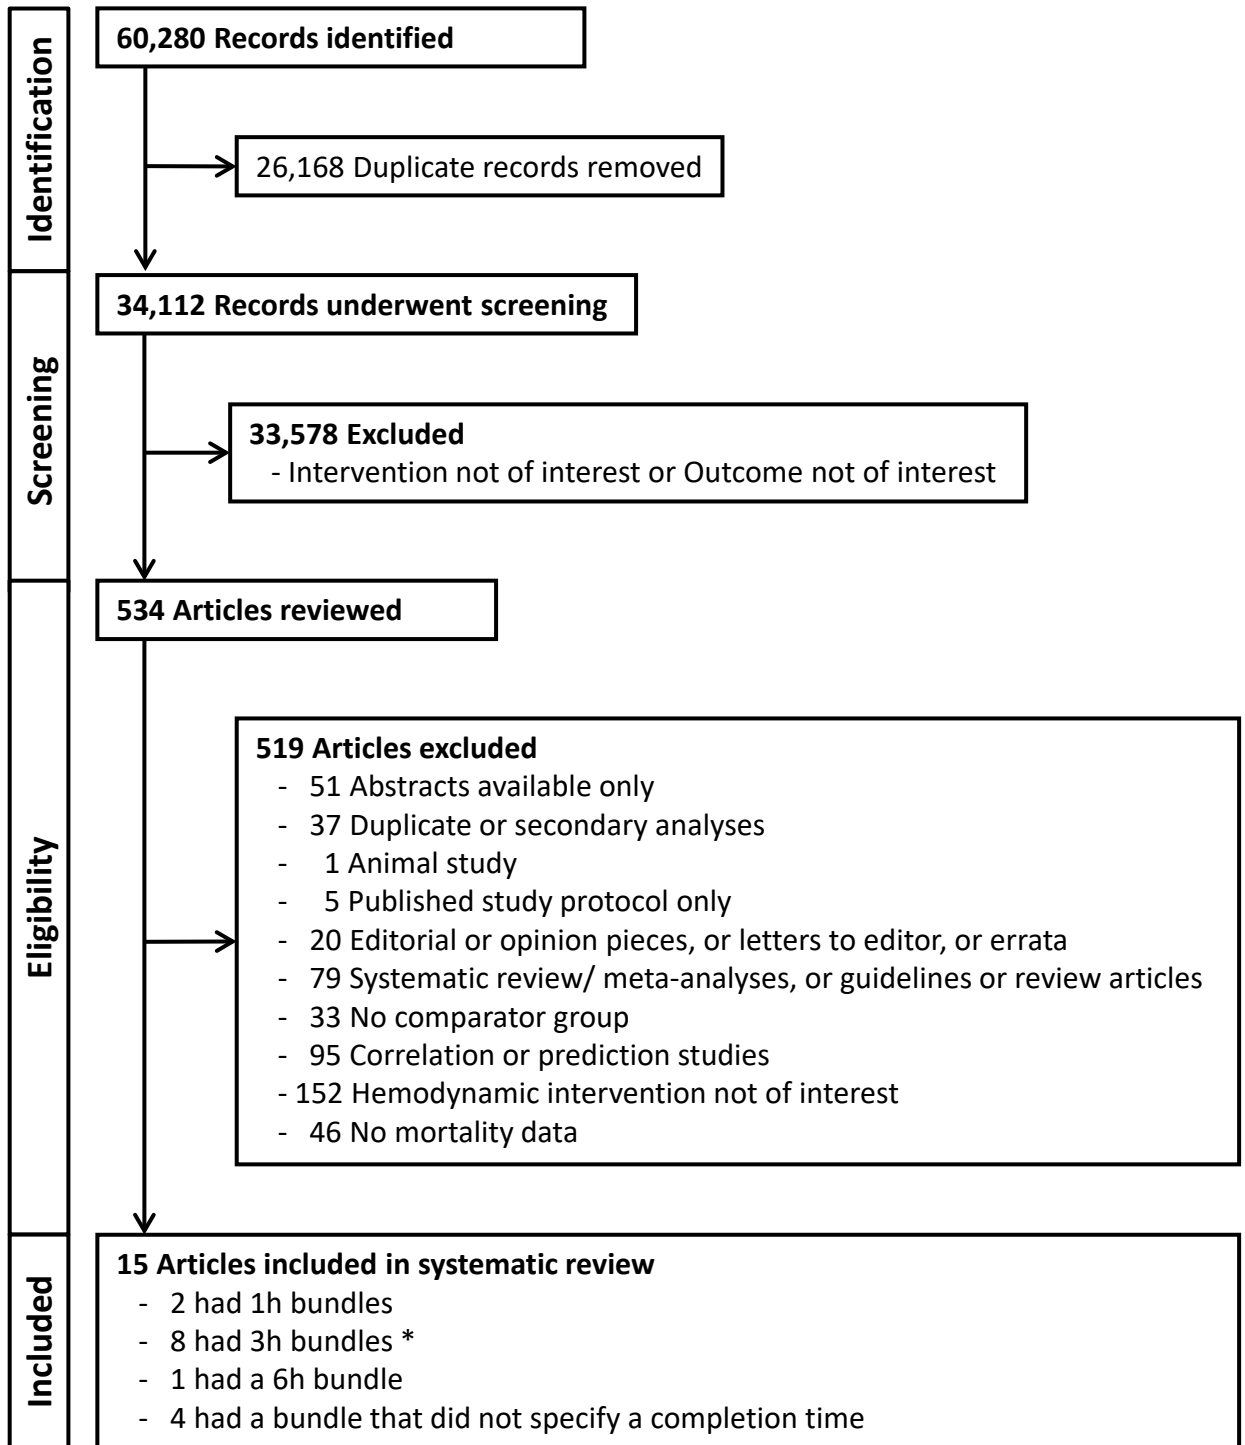

Key:

\* One of these articles investigated three individual cohorts of patients and each cohort is treated as a separate study in the present analysis. Seventeen total studies were analyzed here.

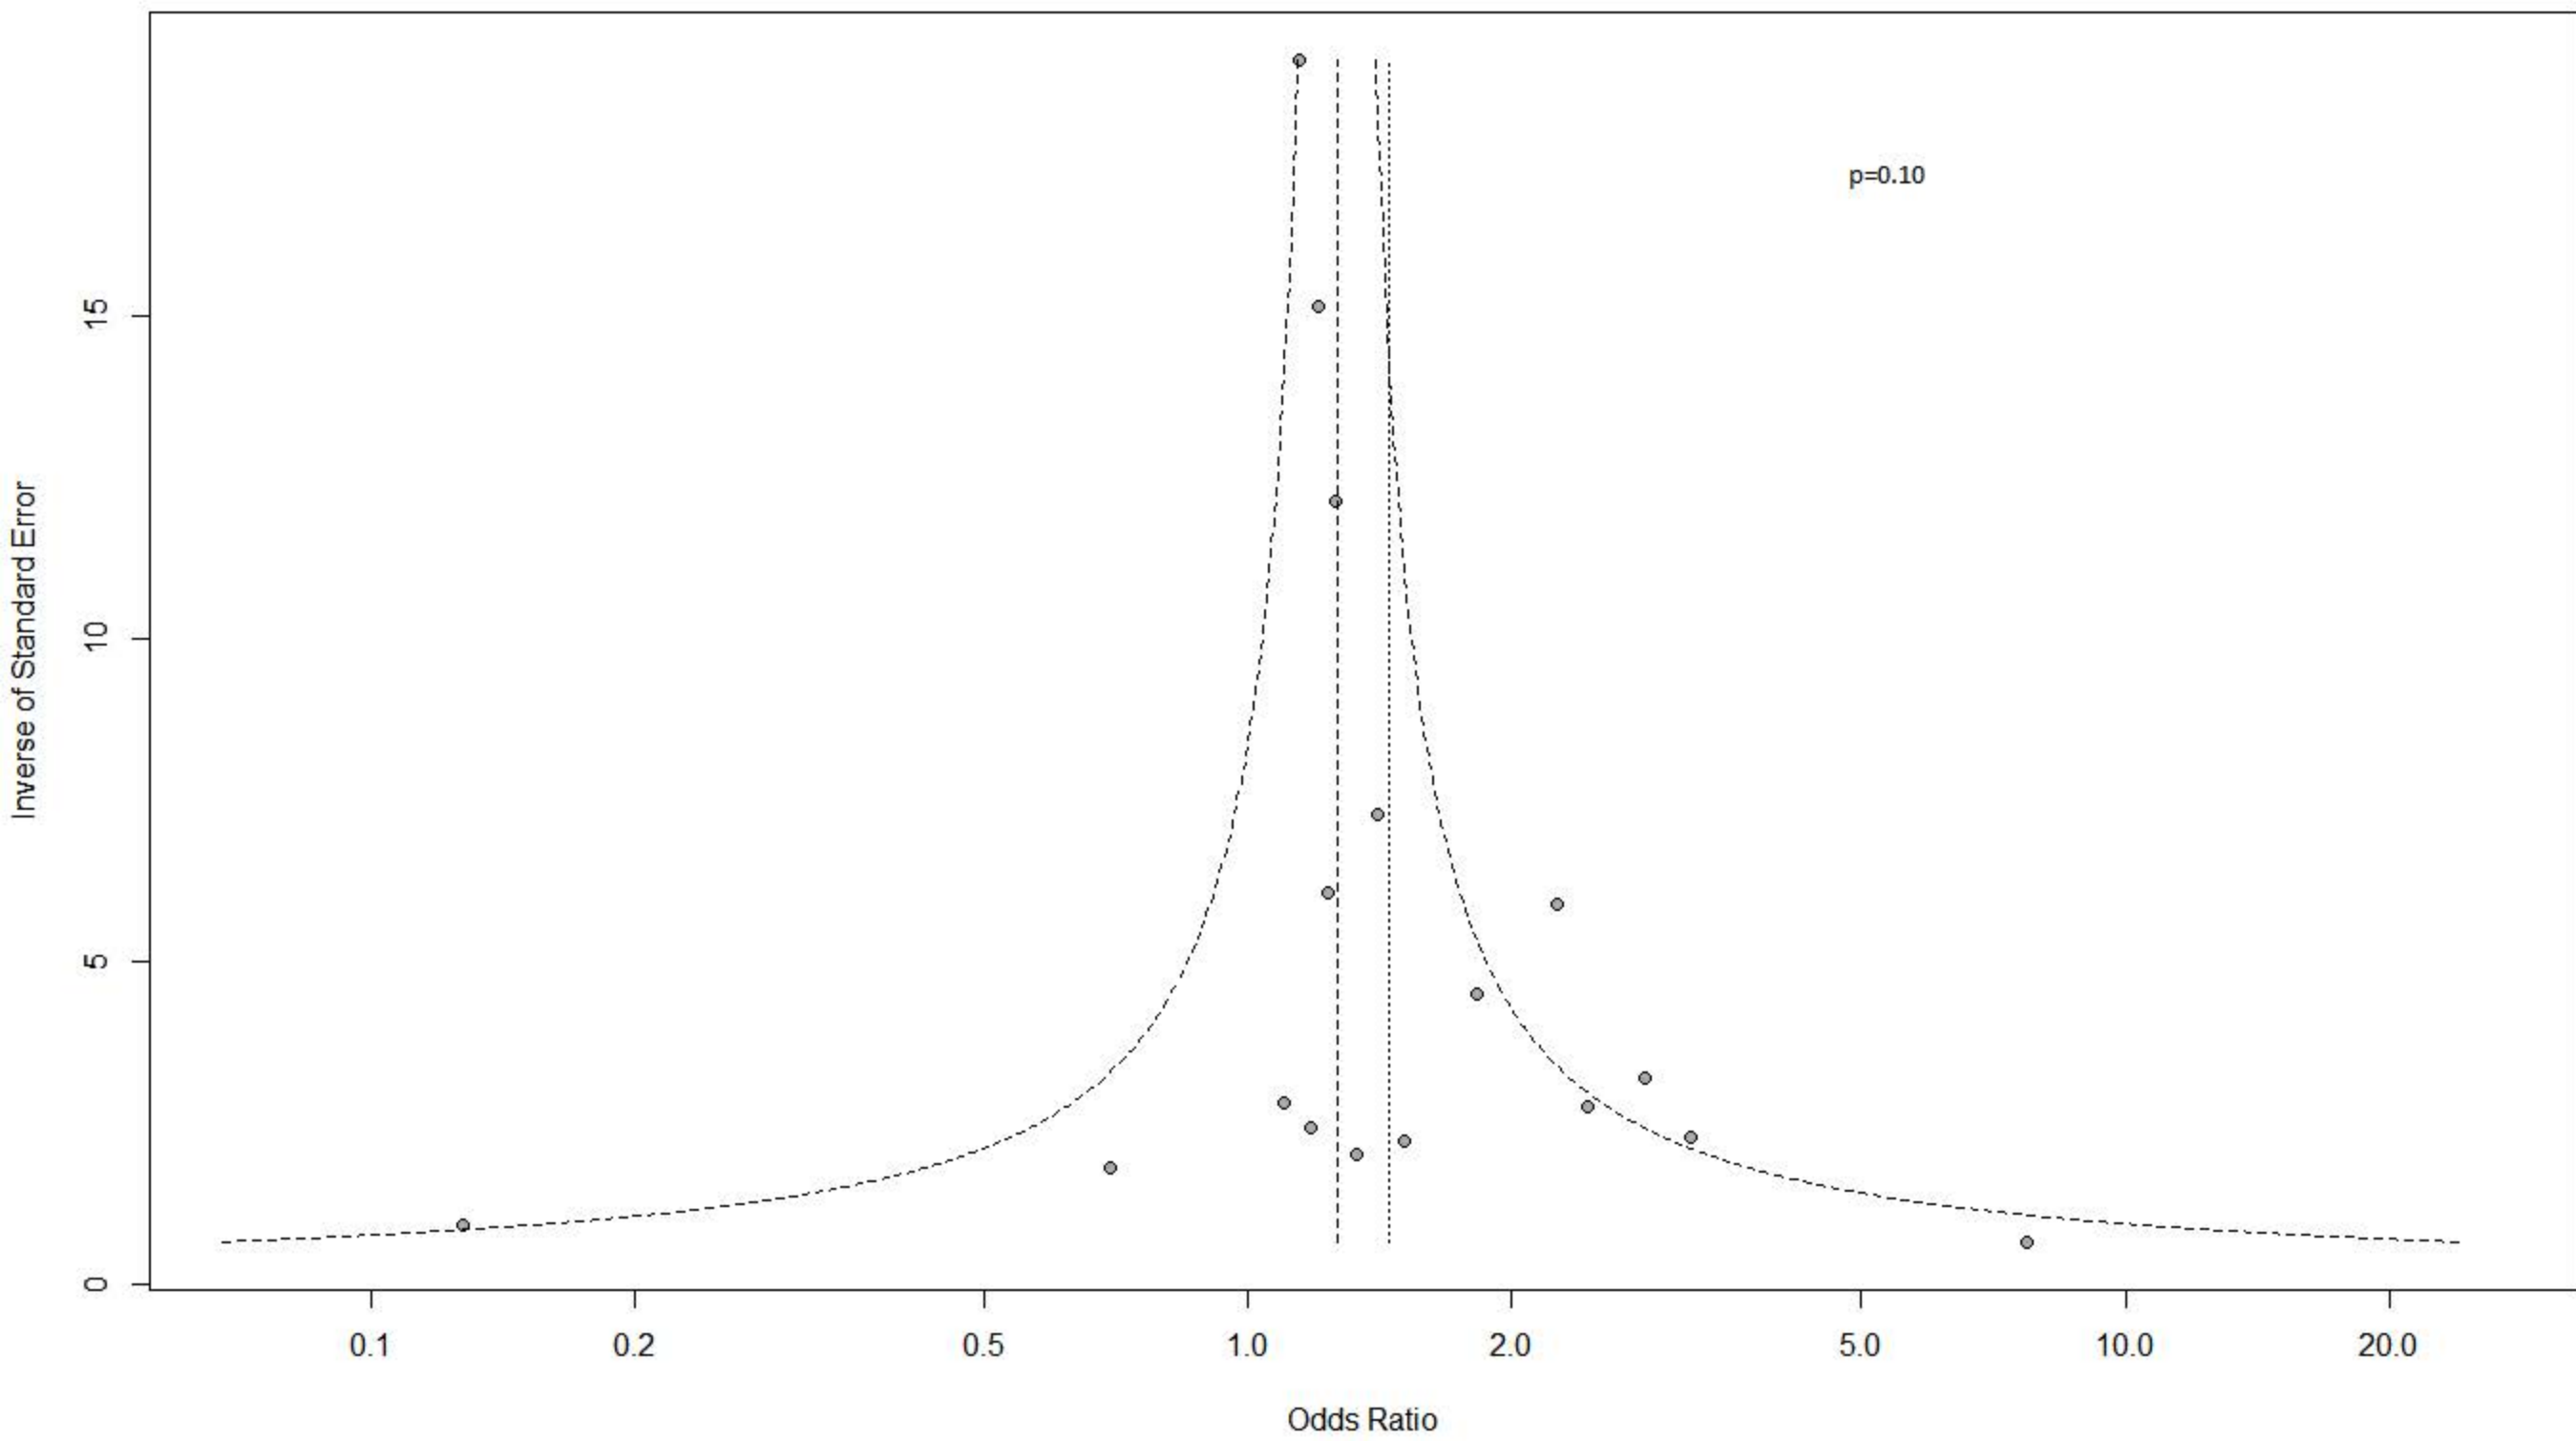



Appendix Figure 3

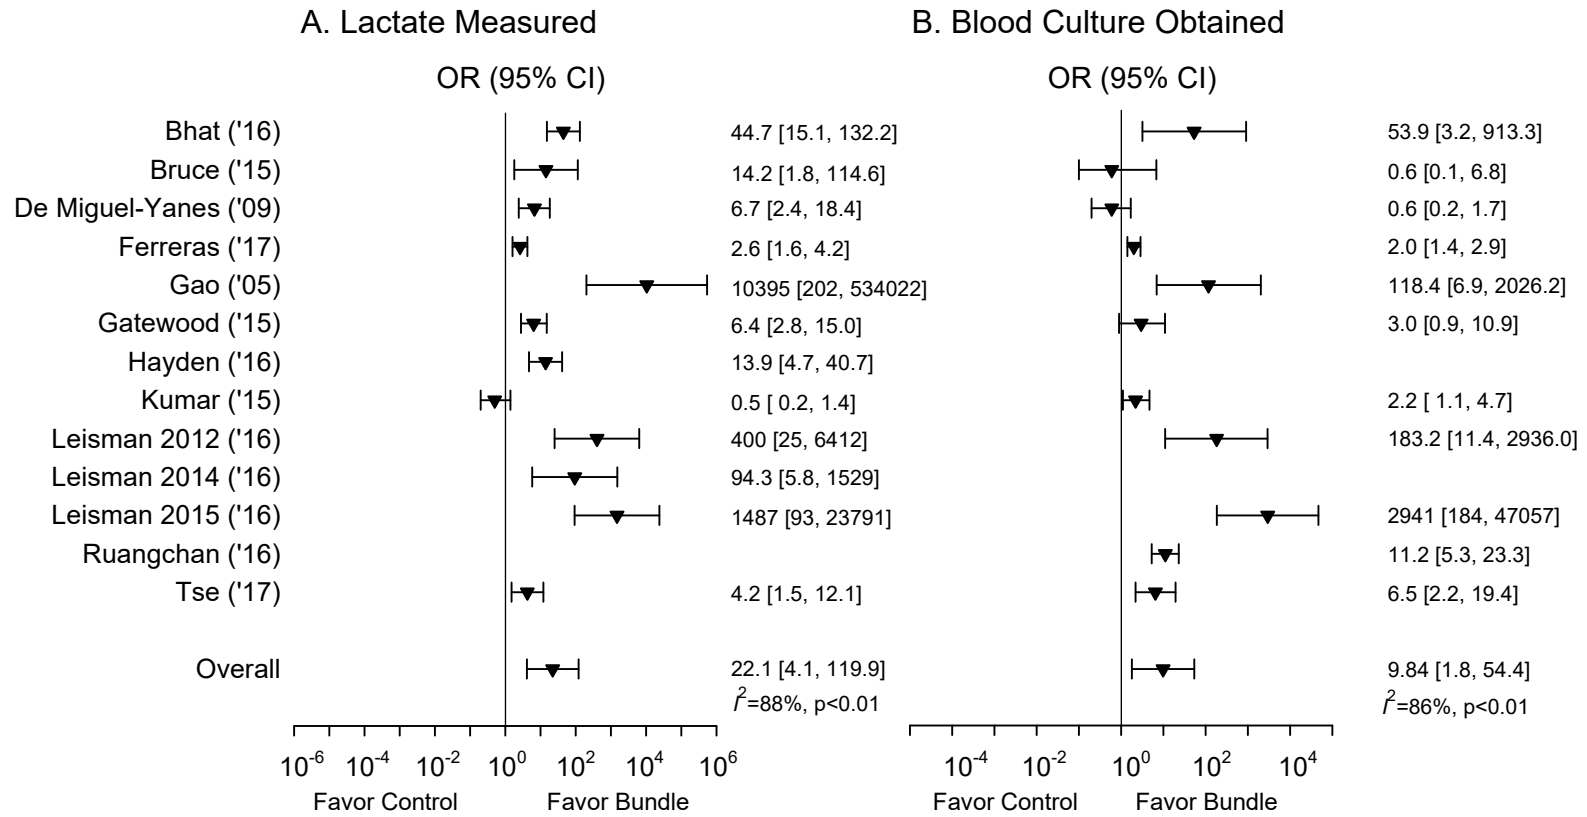

**Appendix Table 1. CMS SEP-1 Performance Measure version 5.4**

|                                                                                                                                                                                                        |                                                                     |
|--------------------------------------------------------------------------------------------------------------------------------------------------------------------------------------------------------|---------------------------------------------------------------------|
| Date of first release notes                                                                                                                                                                            | 12/27/2017                                                          |
| Hospital IQR Program measurement period                                                                                                                                                                | 7/1/18 (third quarter of 2018) to 12/31/18 (fourth quarter of 2018) |
| Received within three hours of presentation of severe sepsis:                                                                                                                                          |                                                                     |
| <ul style="list-style-type: none"> <li>• Initial lactate level measurement</li> <li>• Broad spectrum or other antibiotics administered</li> <li>• Blood cultures drawn prior to antibiotics</li> </ul> | Yes                                                                 |
| AND received within six hours of presentation of severe sepsis:                                                                                                                                        |                                                                     |
| <ul style="list-style-type: none"> <li>• Repeat lactate level measurement only if initial lactate level is elevated</li> </ul>                                                                         | Yes                                                                 |
| AND ONLY if:                                                                                                                                                                                           |                                                                     |
| Initial Hypotension present initiated within three hours of Initial Hypotension:                                                                                                                       | Yes                                                                 |
| <ul style="list-style-type: none"> <li>• Resuscitation with 30 mL/kg crystalloid fluids</li> </ul>                                                                                                     |                                                                     |
| OR                                                                                                                                                                                                     |                                                                     |
| Septic Shock Present initiated within three hours of septic shock presentation:                                                                                                                        |                                                                     |
| <ul style="list-style-type: none"> <li>• Resuscitation with 30 mL/kg crystalloid fluids</li> </ul>                                                                                                     |                                                                     |
| AND ONLY IF hypotension persists after fluid administration, received within six hours of presentation of septic shock:                                                                                | Yes                                                                 |
| <ul style="list-style-type: none"> <li>• Vasopressors</li> </ul>                                                                                                                                       |                                                                     |
| AND ONLY if hypotension persists after fluid administration or initial lactate $\geq 4$ mmol/L, received within six hours of presentation of septic shock:                                             | Yes                                                                 |
| <ul style="list-style-type: none"> <li>• Repeat volume status and tissue perfusion assessment</li> </ul>                                                                                               |                                                                     |
| Figures                                                                                                                                                                                                | Pages 8–17                                                          |
| Tasks                                                                                                                                                                                                  | Up to 75 tasks from pages 18–31                                     |
| IQR = Inpatient Quality Reporting; SEP-1 = Severe Sepsis and Septic Shock Early Management Bundle.                                                                                                     |                                                                     |

**Appendix Table 2. Summary of whether age, co-morbidities, illness severity and site of infection were reported in both intervention and control groups and parameters with imbalances favoring the bundle group (\*\*) in the 17 studies**

| Author (y)            | Age | Sex | Co-morbid Illnesses | Illness Severity | Type of Illness Severity Score Reported | Site of Infection |
|-----------------------|-----|-----|---------------------|------------------|-----------------------------------------|-------------------|
| Austrian ('17)        | Yes | Yes | Yes                 | No               | NR                                      | Yes               |
| Bhat ('16)            | No  | No  | No                  | No               | NR                                      | No                |
| Bruce ('15)           | Yes | Yes | No                  | Yes**            | Organ dysfunction                       | Yes               |
| De Miguel-Yanes ('09) | Yes | Yes | No                  | Yes              | APACHE                                  | Yes               |
| Ferreras ('17)        | Yes | Yes | Yes                 | Yes              | SOFA                                    | Yes               |
| Gao ('05)             | Yes | Yes | No                  | Yes              | MEWS                                    | Yes               |
| Gatewood ('15)        | No  | No  | No                  | No               | NR                                      | No                |
| Hayden ('16)          | Yes | Yes | No                  | No               | NR                                      | Yes               |
| Kumar ('15)           | No  | No  | No                  | No               | NR                                      | No                |
| Leisman 2012* ('16)   | Yes | Yes | No                  | Yes**            | Organ dysfunction                       | No                |
| Leisman 2014* ('16)   | Yes | Yes | Yes                 | Yes**            | Organ dysfunction                       | No                |
| Leisman 2015* ('16)   | Yes | Yes | Yes                 | Yes**            | Organ dysfunction                       | Yes               |
| Liu ('15)             | Yes | Yes | Yes                 | Yes              | LAPS2                                   | No                |
| Prasad ('17)          | Yes | Yes | Yes                 | Yes              | Not stated †                            | No                |
| Ruangchan ('16)       | Yes | Yes | Yes                 | Yes              | SOFA                                    | Yes               |
| Teles ('17)           | Yes | Yes | Yes                 | Yes              | APACHE                                  | Yes               |
| Tse ('17)             | Yes | Yes | Yes                 | Yes              | Organ dysfunction                       | No                |

APACHE = Acute Physiology and Chronic Health Evaluation; MEWS = Modified Early Warning Score; SOFA = Sequential Organ Failure Assessment (SOFA) Score

\* See text for description of these three cohorts

\*\*Higher systolic blood pressure in one study (Bruce'15) or evidence of reduced injury for some organ at baseline in three studies (Leisman 2012, 2014 and 2015) potentially favoring the bundle groups

† Severity of illness reported as minor, moderate, major or extreme

**Appendix Table 3. Summary of the outcomes reported in the 17 studies**

| Author (y)            | Primary Endpoint      | Secondary Endpoint(s)             | Mortality Definition | Adjusted Mortality | Variables Examined in Multivariate Analysis                               |
|-----------------------|-----------------------|-----------------------------------|----------------------|--------------------|---------------------------------------------------------------------------|
| Austrian ('17)        | HM                    | HLOS, Time to first lactate       | HM                   | No                 | NR                                                                        |
| Bhat ('16)            | M                     | LOS                               | M                    | No                 | NR                                                                        |
| Bruce ('15)           | HM                    | Compliance, time to antibiotics   | HM                   | Yes                | Organ dysfunction, UTI, positive blood culture, vasopressors, body weight |
| De Miguel-Yanes ('09) | Compliance            | HM                                | HM                   | Yes                | Acute illness, fluid overload, HDU care                                   |
| Ferreras ('17)        | 30d M                 | HM, Comp                          | 30d M                | No                 | NR                                                                        |
| Gao ('05)             | Compliance            | HM                                | HM                   | No                 | NR                                                                        |
| Gatewood ('15)        | Compliance            | M                                 | M                    | No                 | NR                                                                        |
| Hayden ('16)          | Time to interventions | M                                 | HM                   | No                 | NR                                                                        |
| Kumar ('15)           | Compliance            | HM                                | HM                   | No                 | NR                                                                        |
| Leisman 2012* ('16)   | HM                    | ICU admit, VP                     | HM                   | Yes                | Age, Acute Illness**                                                      |
| Leisman 2014* ('16)   | HM                    | ICU admit, VP, HLOS, HC           | HM                   | Yes                | Age, Acute Illness, Co-morbidities**                                      |
| Leisman 2015* ('16)   | HM                    | ICU admit, ILOS, VP, MV, HLOS, HC | HM                   | Yes                | Age, Acute Illness, Co-morbidities**                                      |
| Liu ('15)             | HM                    | -                                 | HM                   | Yes                | Age, Sex, Acute Illness, Co-morbidities**                                 |
| Prasad ('17)          | HM, Compliance        | -                                 | HM                   | Yes                | Age, Acute Illness, Co-morbidities                                        |
| Ruangchan ('16)       | M                     | ILOS, HLOS                        | M                    | Yes                | Acute Illness                                                             |
| Teles ('17)           | M                     | -                                 | M                    | Yes                | Age, Acute Illness, Co-morbidities                                        |
| Tse ('17)             | HM                    | Time to Abx                       | HM                   | Yes                | Age, Acute Illness                                                        |

mortality: M = mortality; HM = hospital mortality; 28d M = 28-day mortality; 30d M = 30-day mortality; NR = not reported; length of stay: LOS = length of stay; ILOS = ICU length of stay; HLOS = hospital length of stay; Compliance = compliance with bundle components; HC = hospital cost; ICU admit = ICU admission; LC = lactate clearance; MV = mechanical ventilation duration; VP = vasopressor;

\* See Table 1 and text for description of these three cohorts; \*\*Adjusted estimates of bundle effects on survival were reported

**Appendix Table 4. Bundle components to be administered in bundle groups and management in the control groups of the 17 studies**

| Author (y)            | Overall Bundle Time | Bundle Group                          |                 |          |                          |             |        |                                         |                     |                                             | Control Group      |
|-----------------------|---------------------|---------------------------------------|-----------------|----------|--------------------------|-------------|--------|-----------------------------------------|---------------------|---------------------------------------------|--------------------|
|                       |                     | Reported time zero                    | Laboratory Data |          | Antibiotics              |             | Fluids |                                         | Other Interventions |                                             |                    |
|                       |                     |                                       | Lactate         | BCx      | Timing                   | Type        | Timing | Volume                                  | Adjunctive Aids     | Other                                       |                    |
| Austrian ('17)        | NS                  | NR                                    | Yes             | Yes      | NS                       | Appropriate | NS     | NS                                      | Yes                 | -                                           | No sepsis alert    |
| Bhat ('16)            | 1h                  | Sepsis diagnosis                      | Yes, ≤1h        | Yes, ≤1h | ≤1h                      | NS          | ≤1h    | NS                                      | Yes                 | O <sub>2</sub> therapy ≤1h; measure UOP ≤1h | No bundle          |
| Bruce ('15)           | 3h                  | Sepsis diagnosis                      | Yes             | Yes      | NS                       | BS          | ≤30min | ≥20ml/kg bolus                          | Yes                 | -                                           | No bundle          |
| De Miguel-Yanes ('09) | 3h                  | Sepsis diagnosis                      | Yes             | Yes      | ≤3h                      | NS          | ≤1h    | ≥20ml/kg                                | Yes                 | VP/I                                        | No bundle          |
| Ferreras ('17)        | 3h                  | ED arrival                            | Yes             | Yes      | ≤1h                      | NS          | NS     | 30mL/kg                                 | Yes                 | -                                           | No bundle          |
| Gao ('05)             | 6h                  | Sepsis criteria met ‡                 | -               | Yes      | ≤1h                      | NS          | ≤30min | 500mL                                   | No                  | Hb of 7–9g/dL; VP/I                         | Bundle uncompleted |
| Gatewood ('15)        | 3h                  | ED triage                             | Yes             | Yes      | ≤3h                      | NS          | ≤2h    | ≥2L                                     | Yes                 | -                                           | No bundle          |
| Hayden ('16)          | NS                  | ED arrival                            | Yes             | Yes      | NS                       | BS          | NS     | 30mL/kg bolus                           | Yes                 | -                                           | No bundle          |
| Kumar ('15)           | 1h                  | Initial nursing assessment            | Yes, ≤1h        | Yes, ≤1h | ≤1h                      | NS          | ≤1h    | NS                                      | Yes                 | -                                           | No bundle          |
| Leisman 2012 ('16)*   | 3h                  | Sepsis criteria met §                 | Yes             | Yes      | ≤3h                      | BS          | ≤30min | 30mL/kg bolus                           | Yes                 | -                                           | Bundle uncompleted |
| Leisman 2014 ('16)*   | 3h                  | Sepsis criteria met §                 | Yes             | Yes      | ≤3h                      | BS          | ≤30min | 30mL/kg bolus                           | Yes                 | -                                           | Bundle uncompleted |
| Leisman 2015 ('16)*   | 3h                  | Sepsis criteria met §                 | Yes             | Yes      | ≤3h                      | BS          | ≤30min | 30mL/kg bolus                           | Yes                 | -                                           | Bundle uncompleted |
| Liu ('16)             | 3h                  | Initial lactate test results obtained | Yes**           | NS       | ≤3h                      | NS          | ≤3h    | 30mL/kg                                 | Yes                 | -                                           | No bundle          |
| Prasad ('17)          | 3h                  | Sepsis criteria met ¶                 | Yes             | Yes      | ≤3h in ED; ≤1h inpatient | NS          | NS     | NS                                      | No                  | VP/I                                        | Bundle uncompleted |
| Ruangchan ('16)       | NS                  | Sepsis diagnosis                      | -               | Yes      | ≤1h                      | Empiric     | ≤2h    | 1.5 to 2L                               | No                  | -                                           | Bundle uncompleted |
| Teles ('17)           | 3h                  | Sepsis diagnosis                      | Yes             | Yes      | ≤1h                      | BS          | NS     | 30mL/kg bolus                           | No                  | VP/I                                        | Bundle uncompleted |
| Tse ('17)             | NS                  | ED registration                       | Yes             | Yes      | ≤1h                      | NS          | NS     | 500-1000mL bolus, titrate up to 30mL/kg | Yes                 | VP/I                                        | No bundle          |

\* See text for description of these three cohorts; \*\* obtained second lactate value; ‡ All the following fulfilled: signs and symptoms of infection, documented source of infection and ≥1 organ dysfunction; § Time of laboratory result or time of vital sign measurement causing patient to meet sepsis criteria; ¶ Time at which two SIRS criteria and one sign of organ failure in the presence of known or suspected infection met

NS = not stated; BS = broad-spectrum antibiotics; O<sub>2</sub> = oxygen; UOP = urine output; Hb = hemoglobin; VP/I = vasopressor and/or inotrope for persistent hypotension

**Appendix Table 5. Summary of data regarding antibiotic goals and administration in the control and bundle groups in each of the 17 studies**

| Author (y)            | Antibiotic Administration       |                            |     |                      |              |                             |                                    |
|-----------------------|---------------------------------|----------------------------|-----|----------------------|--------------|-----------------------------|------------------------------------|
|                       | Goal                            | % of Patients Meeting Goal |     | Time to Antibiotics* |              | Reported % Culture Positive | Reported % Appropriate Antibiotics |
|                       |                                 | C                          | B   | C                    | B            |                             |                                    |
| Austrian ('17)        | NR                              | NR                         | NR  | NR                   | NR           | NR                          | NR                                 |
| Bhat ('16)            | <1h                             | 9                          | 81  | NR                   | NR           | NR                          | NR                                 |
| Bruce ('15)           | Broad spectrum antibiotics      | 76                         | 77  | 135 (40,336)         | 108 (20,699) | NR                          | NR                                 |
| De Miguel-Yanes ('09) | < 3h                            | 25                         | 62  | NR                   | NR           | NR                          | NR                                 |
| Ferreras ('17)        | <1h                             | NR                         | NR  | 112 (55, 169)        | 89 (41, 166) | 36 – 48% ‡                  | NR                                 |
| Gao ('05)             | < 6h                            | NR                         | NR  | NR                   | NR           | NR                          | NR                                 |
| Gatewood ('15)        | < 3h                            | 50                         | 84  | NR                   | NR           | NR                          | NR                                 |
| Hayden ('16)          | Broad spectrum antibiotics      | NR                         | NR  | 139±74               | 81±39        | 54 – 77% ‡                  | NR                                 |
| Kumar ('15)           | <1h                             | 29                         | 52  | NR                   | NR           | NR                          | NR                                 |
| Leisman 2012 ('16)    | < 3h                            | 68                         | 100 | 87 (-10, 184)        | 38 (-19, 95) | NR                          | NR                                 |
| Leisman 2014 ('16)    | < 3h                            | 75                         | 100 | 66 (20, 172)         | 32 (1, 73)   | NR                          | NR                                 |
| Leisman 2015 ('16)    | < 3h                            | 59                         | 100 | 85 (20, 208)         | 29 (-4, 66)  | NR                          | NR                                 |
| Liu ('15)             | < 3h                            | 95                         | 96  | 48±66                | 42±66        | NR                          | NR                                 |
| Prasad ('17)          | < 3h in ED or < 1h as inpatient | NR                         | NR  | NR                   | NR           | NR                          | NR                                 |
| Ruangchan ('16)       | < 1h                            | 40                         | 89  | NR                   | NR           | NR                          | NR                                 |
| Teles ('17)           | < 1h                            | NR                         | NR  | NR                   | NR           | 14% ‡                       | NR                                 |
| Tse ('17)             | <1h                             | 39                         | 73  | NR                   | NR           | 88% ‡                       | NR                                 |

C – Control; B – Bundle group; NR – not reported;

\* Reported as either mean (±SD) or median (IQR) minutes; † Variability for time to antibiotics, volume of fluid and time to fluid administration not reported;

‡ any culture positive, sensitivities to identified organism not provided

**Appendix Table 6. Summary of data regarding fluid goals and infusion in the control and bundle groups in each of the 17 studies**

| Author (y)            | Fluid Infusion                             |                            |     |                  |                     |                  |                              |
|-----------------------|--------------------------------------------|----------------------------|-----|------------------|---------------------|------------------|------------------------------|
|                       | Goal                                       | % of Patients Meeting Goal |     | Volume of fluid  |                     | Time to fluid    |                              |
|                       |                                            | C                          | B   | C                | B                   | C                | B                            |
| Austrian ('17)        | NR                                         | NR                         | NR  | NR               | NR                  | NR               | NR                           |
| Bhat ('16)            | ≤ 1h                                       | 9                          | 74  | NR               | NR                  | NR               | NR                           |
| Bruce ('15)           | ≥ 20mL/kg ≤30min                           | 58                         | 72  | NR               | NR                  | NR               | NR                           |
| De Miguel-Yanes ('09) | 20mL/kg                                    | NR                         | NR  | NR               | NR                  | NR               | NR                           |
| Ferreras ('17)        | 30mL/kg                                    | 26                         | 57  | NR               | NR                  | 131<br>(88, 182) | 92<br>(48, 170) <sup>‡</sup> |
| Gao ('05)             | 500mL q30min                               | NR                         | NR  | NR               | NR                  | NR               | NR                           |
| Gateway ('15)         | 2L ≤2h                                     | 46                         | 74  | NR               | NR                  | NR               | NR                           |
| Hayden ('16)          | 30mL/kg                                    | NR                         | NR  | NR               | NR                  | 56±64            | 35±31                        |
| Kumar ('15)           | ≤1h                                        | 29                         | 52  | NR               | NR                  | NR               | NR                           |
| Leisman 2012 ('16)    | ≤30min                                     | 36                         | 100 | NR               | NR                  | 48<br>(-11,107)  | 4.5<br>(-32, 41)             |
| Leisman 2014 ('16)    | ≤30min                                     | 36                         | 100 | NR               | NR                  | 34<br>(0, 73)    | 0<br>(0, 7)                  |
| Leisman 2015 ('16)    | ≤30min                                     | 31                         | 100 | NR               | NR                  | 42<br>(-20, 120) | 0<br>(-48, 10)               |
| Liu ('16)             | 30mL/kg ≤3h                                | 60                         | 67  | 1800±1200        | 1900±1200           | NR               | NR                           |
| Prasad ('17)          | Fluid bolus                                | NR                         | NR  | NR               | NR                  | NR               | NR                           |
| Ruangchan ('16)       | 1.5 to 2L ≤2h                              | NR                         | NR  | 220<br>(160,628) | 1500<br>(1000,2000) | NR               | NR                           |
| Teles ('17)           | 30mL/kg                                    | NR                         | NR  | NR               | NR                  | NR               | NR                           |
| Tse ('17)             | 500-1000mL NS bolus, titrate up to 30mL/kg | NR                         | NR  | NR               | NR                  | NR               | NR                           |

C – Control; B – Bundle group; NR – not reported;

\* Reported as either mean (±SD) or median (IQR) minutes; † Variability for time to antibiotics, volume of fluid and time to fluid administration not reported; ‡ Data verified with first author; § All the following fulfilled: signs and symptoms of infection, documented source of infection and ≥1 organ dysfunction; || Time of laboratory result or vital sign measurement causing patient to meet sepsis criteria

¶ Time at which two SIRS criteria and one sign of organ failure in the presence of known or suspected infection met

**Appendix Table 7. Summary of data reported regarding lactate measurements, blood cultures, vasopressor administration and bundle use in patients in the control and bundle groups in each of the 17 studies**

|                       | Lactate Measurement                    |     |                               |        |               |         | Blood Cultures                    |     | Vasopressor Administration      |     |                        |         | Bundle Use                               |     |
|-----------------------|----------------------------------------|-----|-------------------------------|--------|---------------|---------|-----------------------------------|-----|---------------------------------|-----|------------------------|---------|------------------------------------------|-----|
|                       | % of patients with lactate measurement |     | Time to lactate measurement * |        | Lactate level |         | % of patients with blood cultures |     | % of patients with vasopressors |     | Time to vasopressors * |         | % of patients with all bundle components |     |
|                       | C                                      | B   | C                             | B      | C             | B       | C                                 | B   | C                               | B   | C                      | B       | C                                        | B   |
| Austrian ('17)        | 91                                     | 91  | 11 ±56                        | 10±35  | NR            | NR      | 79                                | 79  | 29                              | 23  | NR                     | NR      | NR                                       | NR  |
| Bhat ('16)            | 9                                      | 81  | NR                            | NR     | NR            | NR      | 67                                | 100 | NR                              | NR  | NR                     | NR      | 1                                        | 67  |
| Bruce ('15)           | 84                                     | 99  | NR                            | NR     | NR            | NR      | 98                                | 97  | NR                              | NR  | NR                     | NR      | NR                                       | NR  |
| De Miguel-Yanes ('09) | 12                                     | 46  | NR                            | NR     | NR            | NR      | 85                                | 78  | NR                              | NR  | NR                     | NR      | NR                                       | NR  |
| Ferrerias ('17)       | 69                                     | 86  | NR                            | NR     | NR            | NR      | 50                                | 66  | NR                              | NR  | NR                     | NR      | NR                                       | NR  |
| Gao ('05)             | 0                                      | 100 | NR                            | NR     | NR            | NR      | 46                                | 100 | 38                              | 100 | NR                     | NR      | 0                                        | 100 |
| Gatewood ('15)        | 63                                     | 92  | NR                            | NR     | NR            | NR      | 90                                | 96  | NR                              | NR  | NR                     | NR      | 28                                       | 71  |
| Hayden ('16)          | 69                                     | 97  | NR                            | NR     | 2.4±2.4       | 2.8±2.4 | NR                                | NR  | NR                              | NR  | 139±219                | 125±132 | NR                                       | NR  |
| Kumar ('15)           | 18                                     | 10  | NR                            | NR     | NR            | NR      | 33                                | 52  | NR                              | NR  | NR                     | NR      | 4                                        | 8   |
| Leisman 2012 ('16)    | 84                                     | 100 | NR                            | NR     | NR            | NR      | 92                                | 100 | NR                              | NR  | NR                     | NR      | NR                                       | NR  |
| Leisman 2014 ('16)    | 94                                     | 100 | NR                            | NR     | NR            | NR      | NR                                | NR  | NR                              | NR  | NR                     | NR      | NR                                       | NR  |
| Leisman 2015 ('16)    | 74                                     | 100 | NR                            | NR     | NR            | NR      | 59                                | 100 | NR                              | NR  | NR                     | NR      | NR                                       | NR  |
| Liu ('15)†            | NR                                     | NR  | 114±126                       | 114±72 | 2.6±0.6       | 2.6±0.6 | NR                                | NR  | NR                              | NR  | NR                     | NR      | 34                                       | 45  |
| Prasad ('17)          | NR                                     | 100 | NR                            | NR     | NR            | NR      | NR                                | 100 | NR                              | 100 | NR                     | NR      | 28                                       | 72  |
| Ruangchan ('16)       | NR                                     | NR  | NR                            | NR     | NR            | NR      | 50                                | 92  | 33                              | 59  | NR                     | NR      | NR                                       | NR  |
| Teles ('17)           | NR                                     | NR  | NR                            | NR     | NR            | NR      | NR                                | NR  | NR                              | NR  | NR                     | NR      | NR                                       | NR  |
| Tse ('17)             | 39                                     | 73  | NR                            | NR     | NR            | NR      | 29                                | 73  | NR                              | NR  | NR                     | NR      | NR                                       | NR  |

C – Control; B – Bundle group; NR – not reported;

\*reported as mean(±SD) minutes; † % of patients with second lactate 50% vs 51%



**Appendix Table 8. Summary of whether educational and/or prioritized care aids were employed, the risk of bias and whether adverse events with bundle use were recorded in the 17 Studies**

| Authors (y)           | Adjunctive Aid <sup>†</sup> | Educational Aid | Prioritized Care Aid |              |                   | Risk of Bias        | Adverse Events Recorded |
|-----------------------|-----------------------------|-----------------|----------------------|--------------|-------------------|---------------------|-------------------------|
|                       |                             |                 | Lectures/ Meetings   | Sepsis Alert | Expedited consult | Screening checklist |                         |
| Austrian ('17)        | Yes                         | +               | +                    | -            | +                 | 4                   | No                      |
| Bhat ('16)            | Yes                         | -               | +                    | -            | -                 | 5                   | No                      |
| Bruce ('15)           | Yes                         | +               | +                    | -            | -                 | 2                   | No                      |
| De Miguel-Yanes ('09) | Yes                         | +               | ?                    | ?            | ?                 | 2                   | No                      |
| Ferreras ('17)        | Yes                         | +               | +                    | -            | +                 | 3                   | No                      |
| Gao ('05)             | No                          | -               | -                    | -            | -                 | 4                   | No                      |
| Gatewood ('15)        | Yes                         | -               | +                    | -            | +                 | 4                   | No                      |
| Hayden ('16)          | Yes                         | -               | +                    | -            | -                 | 4                   | No                      |
| Kumar ('15)           | Yes                         | +               | -                    | -            | +                 | 4                   | No                      |
| Leisman 2012* ('16)   | Yes                         | -               | +                    | -            | -                 | 2                   | No                      |
| Leisman 2014* ('16)   | Yes                         | -               | +                    | -            | -                 | 2                   | No                      |
| Leisman 2015* ('16)   | Yes                         | -               | +                    | -            | -                 | 2                   | No                      |
| Liu ('15)             | Yes                         | +               | -                    | -            | -                 | 3                   | No                      |
| Prasad ('17)          | No                          | -               | -                    | -            | -                 | 3                   | No                      |
| Ruangchan ('16)       | No                          | -               | -                    | -            | -                 | 4                   | No                      |
| Teles ('17)           | No                          | -               | -                    | -            | -                 | 3                   | No                      |
| Tse ('17)             | Yes                         | +               | -                    | -            | +                 | 3                   | No                      |

\* See text for description of these three cohorts

<sup>†</sup> Adjunctive aids included educational aids introduced to improve recognition or management of septic patients by providers (e.g. lectures or meetings) or prioritized care aids (e.g. sepsis pager/alert systems, expedited sepsis consults and sepsis checklists/ triage systems)

**Appendix Table 9. Risk of bias assessment for all elements of the Newcastle-Ottawa Tool for each of the 17 observational studies**

| Author (y)            | Selection Bias                                              |                                                     |                                  | Comparability Bias <sup>†</sup>          |                                                                 | Outcome Bias <sup>‡</sup>                         |                          |                                 |
|-----------------------|-------------------------------------------------------------|-----------------------------------------------------|----------------------------------|------------------------------------------|-----------------------------------------------------------------|---------------------------------------------------|--------------------------|---------------------------------|
|                       | Intervention group represents at risk patients <sup>§</sup> | Controls from same population as intervention group | Data obtained from secure source | Analysis controlled for illness severity | Analysis controlled for co-morbidities, age, and infection site | Mortality assessed blindly or from record linkage | ≥ 28d mortality reported | Adequacy follow-up <sup>¶</sup> |
| Austrian ('17)        | Yes                                                         | Yes                                                 | Yes                              | No                                       | No                                                              | Yes                                               | No                       | UK                              |
| Bhat ('16)            | No                                                          | Yes                                                 | Yes                              | No                                       | No                                                              | Yes                                               | No                       | UK                              |
| Bruce ('15)           | Yes                                                         | Yes                                                 | Yes                              | Yes                                      | No                                                              | Yes                                               | Yes                      | UK                              |
| De Miguel-Yanes ('09) | Yes                                                         | Yes                                                 | Yes                              | Yes                                      | No                                                              | Yes                                               | Yes                      | UK                              |
| Ferreras ('17)        | Yes                                                         | Yes                                                 | Yes                              | No                                       | No                                                              | Yes                                               | Yes                      | UK                              |
| Gao ('05)             | Yes                                                         | Yes                                                 | Yes                              | No                                       | No                                                              | Yes                                               | No **                    | UK                              |
| Gatewood ('15)        | Yes                                                         | Yes                                                 | Yes                              | No                                       | No                                                              | Yes                                               | No **                    | UK                              |
| Hayden ('16)          | Yes                                                         | Yes                                                 | Yes                              | No                                       | No                                                              | Yes                                               | No **                    | UK                              |
| Kumar ('15)           | Yes                                                         | Yes                                                 | Yes                              | No                                       | No                                                              | Yes                                               | No **                    | UK                              |
| Leisman 2012* ('16)   | Yes                                                         | Yes                                                 | Yes                              | Yes                                      | No                                                              | Yes                                               | No **                    | Yes                             |
| Leisman 2014* ('16)   | Yes                                                         | Yes                                                 | Yes                              | Yes                                      | No                                                              | Yes                                               | No **                    | Yes                             |
| Leisman 2015* ('16)   | Yes                                                         | Yes                                                 | Yes                              | Yes                                      | No                                                              | Yes                                               | No **                    | Yes                             |
| Liu ('15)             | Yes                                                         | Yes                                                 | Yes                              | Yes                                      | No                                                              | Yes                                               | Yes                      | UK                              |
| Prasad ('17)          | Yes                                                         | Yes                                                 | Yes                              | Yes                                      | No                                                              | Yes                                               | No **                    | UK                              |
| Ruangchan ('16)       | Yes                                                         | Yes                                                 | Yes                              | No                                       | No                                                              | Yes                                               | No **                    | UK                              |
| Teles ('17)           | Yes                                                         | Yes                                                 | Yes                              | Yes                                      | No                                                              | Yes                                               | No **                    | UK                              |
| Tse ('17)             | Yes                                                         | Yes                                                 | Yes                              | Yes                                      | No                                                              | Yes                                               | No                       | UK                              |

UK = unknown;

\* See Table 1 and text for description of these three cohorts;

<sup>†</sup> Mortality adjusted for severity of acute illness or co-morbid conditions including all of the following: age, chronic illness and site of infection;

<sup>‡</sup> Mortality at ≥28d was considered long enough follow-up and reports had to state that follow-up was adequate;

<sup>§</sup> Randomly selected patients or all consecutively encountered patients;

<sup>||</sup> Did not report adverse events;

<sup>¶</sup> Study did not provide flow-sheet showing patients screened or reasons for exclusion after screening;

\*\* Reported mortality less than 28-d mortality
